# Supplementary material for: Small chromium-doped silicon clusters CrSin: structures, IR spectra, charge effect, magnetism and chirality
Source: Royal Society of Chemistry journal article supplement (doi:10.1039/d3cp00317e), 2023-01-01
Supplement: d3cp00317e1.pdf [file d3cp00317e1.pdf]

# Small chromium-doped silicon clusters CrSi<sub>n</sub>: Structures, IR spectra, charge effect, magnetism and chirality

**Bao-Ngan Nguyen-Ha,<sup>a,b</sup> Ngoc Thach Pham,<sup>c</sup> Pieterjan Claes,<sup>d</sup> Peter Lievens,<sup>d</sup>**

**André Fielicke,<sup>e</sup> Vu Thi Ngan,<sup>c</sup> Minh Tho Nguyen<sup>f,\*</sup> and Ewald Janssens<sup>d,\*</sup>**

<sup>a</sup> *Laboratory for Chemical Computation and Modeling, Institute for Computational Science and Artificial Intelligence, Van Lang University, Ho Chi Minh City, Vietnam.*

*Email: ngan.nguyenhabao@vlu.edu.vn*

<sup>b</sup> *Faculty of Applied Technology, School of Technology, Van Lang University, Ho Chi Minh City, Vietnam*

<sup>c</sup> *Laboratory of Computational Chemistry and Modeling (LCCM), Department of Chemistry, Faculty of Natural Sciences, Quy Nhon University, Quy Nhon, Vietnam*

<sup>d</sup> *Quantum Solid State Physics, KU Leuven, Celestijnenlaan 200D, B-3001 Leuven, Belgium.*  
*Email: ewald.janssens@kuleuven.be*

<sup>e</sup> *Fritz-Haber-Institut der Max-Planck-Gesellschaft, Faradayweg 4–6, 14195 Berlin, Germany*

<sup>f</sup> *Institute for Computational Science and Technology (ICST), Ho Chi Minh City, Vietnam.*  
*Email: tho.nm@icst.org.vn*

## Content:

- Mass spectrum of produced chromium doped silicon clusters (Figure S1).
- Relative energy comparison between B3P86/6-311+G(d) and B3P86/aug-cc-pVTZ theory levels of cationic, neutral and anionic CrSi<sub>n</sub><sup>+0/-</sup> clusters (n = 3-10) (Table S1).
- Relative energy comparison between B3P86/6-311+G(d) and B3LYP/6-311+G(d) theory levels of anionic CrSi<sub>n</sub><sup>-</sup> cluster (n = 3-10) (Table S2).

- Average binding energy, fragmentation energies and natural population analysis for the ground-states of the cationic, neutral, anionic  $\text{CrSi}_n^{+/0-}$  clusters (Table S3).
- The adiabatic ionization energies ( $\text{IE}_a$ ) and the adiabatic electron affinities ( $\text{AE}_a$ ) of neutral isomers having similar shape to the ground-state cationic and anionic structures (Table S4).
- Stable structures of cationic, neutral and anionic chromium doped silicon clusters  $\text{CrSi}_n^{+/0-}$  with  $n = 3-10$  (Figures S2 to S14).
- IR spectra comparison of  $\text{CrSi}_8^+$  and  $\text{CrSi}_9^+$  clusters between calculation and experiment (Figure S15 and Figure S16).
- Calculated-IR and UV-Vis spectra of ground-state enantiomers  $\text{CrSi}_n^{+/0-}$  ( $n = 9$  for cation,  $n = 7$  for neutral and anion) (Figure S17).
- Calculated-ECD spectra of higher-energy enantiomers of cationic, neutral and anionic  $\text{CrSi}_n^{+/0-}$  clusters with  $n = 3-10$  (Figure S18).

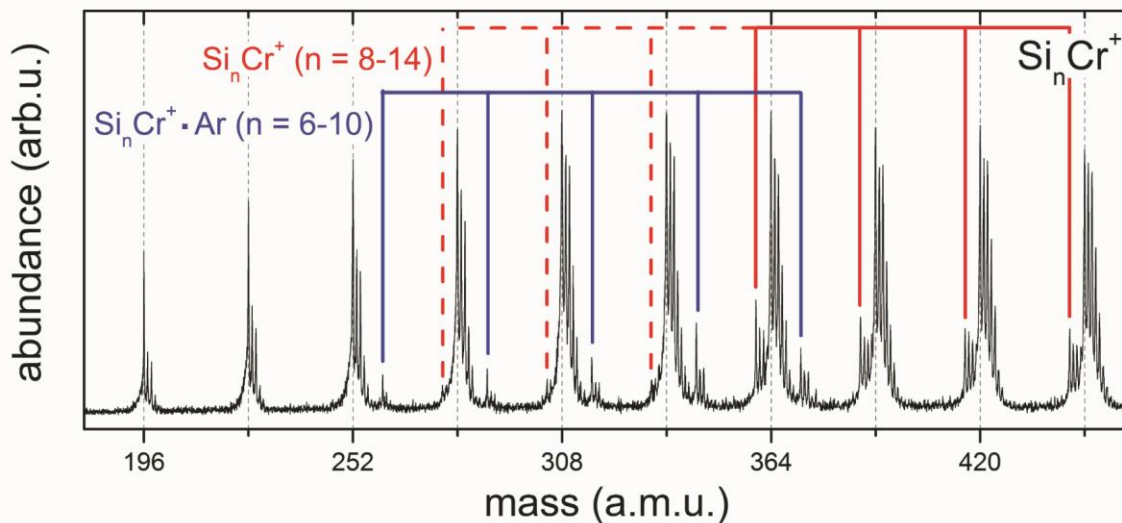

**Figure S1.** Mass spectrum of  $\text{CrSi}_n^+$  clusters with the source at a temperature of 80 K and a 5 % argon mixture in the helium carrier gas. Argon complexes are found for  $\text{CrSi}_n^+ \cdot \text{Ar}$  ( $n = 6-10$ ). For these sizes, no  $\text{CrSi}_n^+$  clusters are observed in the mass spectrum. The exohedrally doped clusters react completely with the argon atoms. Starting from  $\text{CrSi}_{11}\text{Cr}^+$ , unreacted doped clusters appear in the mass spectrum. The highest peaks (on the grid lines) in the mass spectrum correspond to pure  $\text{Si}_n^+$  clusters (note that Si and Cr have multiple isotopes, of which  $^{28}\text{Si}$  and  $^{52}\text{Cr}$  have the highest abundances).

**Table S1.** Relative energy comparison between B3P86/6-311+G(*d*) and B3P86/aug-cc-pVTZ theory levels of cationic, neutral and anionic CrSi<sub>n</sub><sup>+0/-</sup> clusters (n = 3-10)

| Isomer          | Electronic state            | 6-311+G( <i>d</i> ) | aug-cc-pVTZ | Isomer          | Electronic state            | 6-311+G( <i>d</i> ) | aug-cc-pVTZ |
|-----------------|-----------------------------|---------------------|-------------|-----------------|-----------------------------|---------------------|-------------|
| <b>C3-iso1</b>  | <sup>4</sup> B <sub>2</sub> | 0.00                | 0.00        | <b>A9-iso1</b>  | <sup>6</sup> A              | 0.00                | 0.00        |
| <b>C3-iso2</b>  | <sup>4</sup> A <sub>1</sub> | 0.33                | 0.33        | <b>A9-iso2</b>  | <sup>2</sup> A <sub>1</sub> | 0.05                | 0.18        |
| <b>C3-iso3</b>  | <sup>4</sup> A'             | 0.36                | 0.38        | <b>N3-iso1</b>  | <sup>5</sup> A <sub>1</sub> | 0.00                | 0.00        |
| <b>C4-iso1</b>  | <sup>6</sup> A'             | 0.00                | 0.00        | <b>N3-iso1</b>  | <sup>7</sup> A <sub>1</sub> | 0.39                | 0.15        |
| <b>C4-iso2</b>  | <sup>6</sup> A <sub>1</sub> | 0.22                | 0.24        | <b>N3-iso2</b>  | <sup>5</sup> A'             | 0.50                | 0.37        |
| <b>C5-iso1</b>  | <sup>6</sup> A'             | 0.00                | 0.00        | <b>N4-iso1</b>  | <sup>5</sup> B <sub>2</sub> | 0.00                | 0.00        |
| <b>C5-iso2</b>  | <sup>4</sup> A''            | 0.36                | 0.39        | <b>N4-iso1</b>  | <sup>7</sup> A              | 0.31                | 0.32        |
| <b>C6-iso1</b>  | <sup>6</sup> A'             | 0.00                | 0.01        | <b>N4-iso2</b>  | <sup>5</sup> A''            | 0.29                | 0.25        |
| <b>C6-iso2</b>  | <sup>6</sup> A'             | 0.03                | 0.00        | <b>N4-iso3</b>  | <sup>7</sup> A              | 0.31                | 0.30        |
| <b>C7-iso1</b>  | <sup>6</sup> A <sub>1</sub> | 0.00                | 0.00        | <b>N5-iso1</b>  | <sup>5</sup> B <sub>1</sub> | 0.00                | 0.00        |
| <b>C7-iso2</b>  | <sup>6</sup> A              | 0.16                | 0.15        | <b>N5-iso2</b>  | <sup>5</sup> A'             | 0.09                | 0.08        |
| <b>C7-iso3</b>  | <sup>6</sup> A <sub>1</sub> | 0.19                | 0.22        | <b>N7-iso1</b>  | <sup>5</sup> A'             | 0.00                | 0.05        |
| <b>C8-iso1</b>  | <sup>4</sup> A''            | 0.00                | 0.00        | <b>N7-iso2</b>  | <sup>5</sup> A              | 0.02                | 0.01        |
| <b>C8-iso2</b>  | <sup>6</sup> A'             | 0.06                | 0.04        | <b>N7-iso3</b>  | <sup>5</sup> A'             | 0.06                | 0.00        |
| <b>C10-iso1</b> | <sup>6</sup> A              | 0.00                | 0.00        | <b>N7-iso4</b>  | <sup>5</sup> A'             | 0.07                | 0.06        |
| <b>C10-iso2</b> | <sup>6</sup> A'             | 0.04                | 0.03        | <b>N8-iso1</b>  | <sup>5</sup> A''            | 0.00                | 0.00        |
| <b>A6-iso1</b>  | <sup>4</sup> A <sub>1</sub> | 0.00                | 0.00        | <b>N8-iso2</b>  | <sup>5</sup> A              | 0.05                | 0.00        |
| <b>A6-iso2</b>  | <sup>6</sup> A              | 0.32                | 0.33        | <b>N8-iso3</b>  | <sup>3</sup> A'             | 0.06                | 0.01        |
| <b>A7-iso1</b>  | <sup>6</sup> A'             | 0.00                | 0.04        | <b>N8-iso4</b>  | <sup>5</sup> A''            | 0.16                | 0.18        |
| <b>A7-iso1</b>  | <sup>4</sup> A'             | 0.01                | 0.04        | <b>N9-iso1</b>  | <sup>5</sup> A              | 0.00                | 0.00        |
| <b>A7-iso2</b>  | <sup>6</sup> A              | 0.05                | 0.00        | <b>N9-iso2</b>  | <sup>5</sup> A              | 0.07                | 0.12        |
| <b>A8-iso1</b>  | <sup>6</sup> A <sub>1</sub> | 0.00                | 0.00        | <b>N10-iso1</b> | <sup>5</sup> A'             | 0.00                | 0.00        |
| <b>A8-iso2</b>  | <sup>6</sup> A'             | 0.18                | 0.23        | <b>N10-iso2</b> | <sup>7</sup> A <sub>1</sub> | 0.01                | 0.02        |
| <b>A8-iso3</b>  | <sup>6</sup> A'             | 0.22                | 0.16        | <b>N10-iso3</b> | <sup>5</sup> A'             | 0.02                | 0.01        |

**Table S2.** Relative energy comparison between B3P86/6-311+G(*d*) and B3LYP/6-311+G(*d*) theory levels of anionic CrSi<sub>n</sub><sup>-</sup> cluster (n = 6-10)

| Isomer                            | B3P86/6-311+G( <i>d</i> ) | B3LYP/6-311+G( <i>d</i> ) | Isomer         | B3P86/6-311+G( <i>d</i> ) | B3LYP/6-311+G( <i>d</i> ) |
|-----------------------------------|---------------------------|---------------------------|----------------|---------------------------|---------------------------|
| <b>A6-iso1</b>                    | 0.00                      | 0.00                      | <b>A8-iso1</b> | 0.00                      | 0.00                      |
| <b>A6-iso2</b>                    | 0.32                      | 0.46                      | <b>A8-iso2</b> | 0.18                      | 0.02                      |
| <b>A7-iso1</b> ( <sup>6</sup> A') | 0.00                      | 0.00                      | <b>A8-iso3</b> | 0.22                      | 0.13                      |
| <b>A7-iso1</b> ( <sup>4</sup> A') | 0.01                      | 0.03                      | <b>A9-iso1</b> | 0.00                      | 0.00                      |
| <b>A7-iso2-L/R</b>                | 0.05                      | 0.10                      | <b>A9-iso2</b> | 0.05                      | 0.17                      |

**Table S3.** Average binding energy, fragmentation energies and natural population analysis for the ground-states of the cationic, neutral, anionic  $\text{CrSi}_n^{+/0-}$  clusters.

|          | Isomer      | State   | $D_{C/N}(\text{Cr}^+)$ | $D_{N/A}(\text{Cr})$ | $D_{C/N/A}(\text{Si})$ | $E_{b-C/N/A}$ | Atomic charge on Cr | Electron population on Cr's 3d shell | Electron population on Cr's 4s shell | Spin density of Cr | Total Wiberg bond of Cr | Total Wiberg bond of cleaved Si |
|----------|-------------|---------|------------------------|----------------------|------------------------|---------------|---------------------|--------------------------------------|--------------------------------------|--------------------|-------------------------|---------------------------------|
| cation   | C3-iso1     | $^4B_2$ | 4.77                   |                      | 5.02                   | 2.40          | 0.83                | 4.86                                 | 0.30                                 | 4.54               | 1.36                    | 2.32                            |
|          | C4-iso1     | $^6A'$  | 2.10                   |                      | 5.70                   | 2.74          | 0.84                | 4.92                                 | 0.23                                 | 4.82               | 0.66                    | 2.23                            |
|          | C5-iso1     | $^6A'$  | 2.58                   |                      | 5.98                   | 2.95          | 0.77                | 4.90                                 | 0.29                                 | 4.62               | 1.04                    | 2.79                            |
|          | C6-iso1     | $^6A'$  | 2.21                   |                      | 6.42                   | 3.12          | 0.86                | 4.87                                 | 0.25                                 | 4.77               | 0.79                    | 2.47                            |
|          | C6-iso2     | $^6A'$  | 2.19                   |                      | 6.55                   | 3.11          | 0.82                | 4.94                                 | 0.21                                 | 4.73               | 0.74                    | 2.41                            |
|          | C7-iso1     | $^6A_1$ | 2.32                   |                      | 6.20                   | 3.27          | 0.83                | 4.96                                 | 0.20                                 | 4.87               | 0.55                    | 2.83                            |
|          | C7-iso2     | $^6A$   | 2.20                   |                      | 6.01                   | 3.25          | 0.82                | 4.96                                 | 0.20                                 | 4.74               | 0.72                    | 2.72                            |
|          | C7-iso3     | $^6A_1$ | 2.13                   |                      | 6.08                   | 3.25          | 0.82                | 4.92                                 | 0.26                                 | 5.01               | 0.44                    | 2.76                            |
|          | C8-iso1     | $^4A''$ | 5.20                   |                      | 5.72                   | 3.23          | 0.78                | 4.97                                 | 0.22                                 | 4.34               | 1.45                    | 2.48                            |
|          | C8-iso2     | $^6A'$  | 2.95                   |                      | 5.26                   | 3.22          | 0.72                | 4.94                                 | 0.28                                 | 4.69               | 0.94                    | 2.82                            |
|          | C9-iso1-L/R | $^6A$   | 2.42                   |                      | 6.33                   | 3.33          | 0.75                | 5.03                                 | 0.18                                 | 4.54               | 0.91                    | 2.76                            |
|          | C10-iso1    | $^6A$   | 2.52                   |                      | 7.07                   | 3.42          | 0.82                | 4.96                                 | 0.20                                 | 4.71               | 0.74                    | 2.98                            |
| C10-iso2 | $^6A'$      | 2.48    |                        | 6.94                 | 3.42                   | 0.76          | 4.98                | 0.23                                 | 4.66                                 | 0.87               | 3.39                    |                                 |
| neutral  | N3-iso1     | $^5A_1$ | 6.78                   | 3.69                 | 4.96                   | 2.59          | 0.66                | 4.94                                 | 0.38                                 | 4.67               | 1.22                    | 2.74                            |
|          | N3-iso1     | $^7A_1$ | 6.63                   | 2.02                 | 5.52                   | 2.54          | 0.60                | 5.00                                 | 0.38                                 | 4.98               | 0.69                    | 3.02                            |
|          | N4-iso1     | $^5B_2$ | 6.76                   | 2.87                 | 5.62                   | 2.89          | 0.61                | 4.98                                 | 0.33                                 | 4.56               | 1.32                    | 2.65                            |
|          | N5-iso1     | $^5B_1$ | 7.27                   | 4.22                 | 6.07                   | 3.12          | 0.58                | 4.99                                 | 0.36                                 | 4.47               | 1.50                    | 2.85                            |
|          | N5-iso2     | $^5A'$  | 6.77                   | 4.19                 | 6.74                   | 3.10          | 0.63                | 4.99                                 | 0.35                                 | 4.73               | 1.07                    | 2.85                            |
|          | N6-iso1     | $^5B_2$ | 6.77                   | 3.25                 | 5.92                   | 3.25          | 0.64                | 5.05                                 | 0.25                                 | 4.44               | 1.34                    | 2.79                            |
|          | N7-iso1     | $^5A'$  | 7.44                   | 4.14                 | 5.67                   | 3.26          | 0.44                | 5.04                                 | 0.40                                 | 4.32               | 1.76                    | 2.63                            |
|          | N7-iso2-L/R | $^5A$   | 6.81                   | 3.65                 | 5.63                   | 3.25          | 0.61                | 4.98                                 | 0.35                                 | 4.48               | 1.43                    | 2.82                            |
|          | N7-iso3     | $^5A'$  | 6.12                   | 2.41                 | 5.41                   | 3.25          | 0.67                | 5.07                                 | 0.24                                 | 4.62               | 1.01                    | 2.82                            |
|          | N8-iso1     | $^5A''$ | 6.40                   | 3.85                 | 5.67                   | 3.30          | 0.58                | 5.14                                 | 0.22                                 | 4.31               | 1.38                    | 2.73                            |
|          | N8-iso2     | $^5A''$ | 7.00                   | 4.13                 | 6.38                   | 3.29          | 0.61                | 5.03                                 | 0.29                                 | 4.44               | 1.38                    | 3.52                            |
|          | N8-iso3     | $^3A'$  | 9.74                   | 7.10                 | 5.89                   | 3.25          | 0.27                | 5.23                                 | 0.35                                 | 3.90               | 2.45                    | 2.65                            |
|          | N9-iso1     | $^5A$   | 6.82                   | 4.15                 | 6.40                   | 3.36          | 0.56                | 5.10                                 | 0.23                                 | 4.18               | 1.60                    | 3.02                            |
|          | N10-iso1    | $^5A'$  | 6.14                   | 2.80                 | 6.09                   | 3.43          | 0.67                | 5.04                                 | 0.27                                 | 4.59               | 1.02                    | 2.68                            |
|          | N10-iso2    | $^7A_1$ | 6.15                   | 1.62                 | 6.65                   | 3.43          | 0.57                | 4.96                                 | 0.45                                 | 5.04               | 0.77                    | 2.71                            |
|          | N10-iso3    | $^5A'$  | 6.13                   | 2.89                 | 6.30                   | 3.43          | 0.60                | 5.09                                 | 0.27                                 | 4.53               | 1.16                    | 3.07                            |
| anion    | A3-iso1     | $^6A_1$ |                        | 3.06                 | 5.69                   | 2.80          | 0.30                | 4.99                                 | 0.66                                 | 5.08               | 1.04                    | 2.96                            |
|          | A4-iso1     | $^4A_2$ |                        | 5.34                 | 6.15                   | 3.00          | 0.42                | 5.09                                 | 0.40                                 | 4.38               | 1.81                    | 2.78                            |
|          | A5-iso1     | $^6A'$  |                        | 3.37                 | 7.07                   | 3.29          | 0.46                | 5.05                                 | 0.44                                 | 4.87               | 1.03                    | 2.84                            |
|          | A6-iso1     | $^4A_1$ |                        | 7.42                 | 7.29                   | 3.37          | 0.24                | 5.04                                 | 0.57                                 | 4.15               | 2.41                    | 3.07                            |
|          | A6-iso2     | $^6A$   |                        | 2.91                 | 5.67                   | 3.33          | 0.50                | 5.16                                 | 0.27                                 | 4.65               | 1.00                    | 2.85                            |
|          | A7-iso1     | $^6A'$  |                        | 4.40                 | 6.39                   | 3.38          | 0.28                | 5.14                                 | 0.41                                 | 4.51               | 1.48                    | 3.06                            |
|          | A7-iso1     | $^4A'$  |                        | 6.96                 | 6.20                   | 3.38          | 0.03                | 5.28                                 | 0.47                                 | 3.89               | 2.50                    | 3.06                            |
|          | A7-iso2-L/R | $^6A$   |                        | 3.09                 | 5.71                   | 3.37          | 0.45                | 5.07                                 | 0.43                                 | 4.75               | 1.14                    | 2.95                            |
|          | A8-iso1     | $^6A_1$ |                        | 3.24                 | 6.33                   | 3.45          | 0.52                | 5.21                                 | 0.23                                 | 4.54               | 1.03                    | 2.98                            |
|          | A8-iso2     | $^6A'$  |                        | 2.92                 | 6.68                   | 3.43          | 0.47                | 4.97                                 | 0.55                                 | 5.03               | 0.94                    | 3.04                            |
|          | A8-iso3     | $^6A'$  |                        | 3.80                 | 6.66                   | 3.42          | 0.52                | 5.09                                 | 0.33                                 | 4.62               | 1.12                    | 3.60                            |
|          | A9-iso1     | $^6A$   |                        | 3.75                 | 6.19                   | 3.50          | 0.43                | 5.23                                 | 0.23                                 | 4.43               | 1.21                    | 3.06                            |
|          | A9-iso2     | $^2A_1$ |                        | 10.02                | 6.60                   | 3.49          | -1.73               | 6.90                                 | 0.47                                 | 0.96               | 4.26                    | 3.13                            |
| A10-iso1 | $^2A$       |         | 10.73                  | 6.33                 | 3.55                   | -2.64         | 7.77                | 0.45                                 | 0.81                                 | 4.22               | 2.91                    |                                 |

**Table S4.** The adiabatic ionization energies ( $IE_a$ ) and the adiabatic electron affinities ( $AE_a$ ) of neutral isomers having similar shape to the ground-state cationic and anionic structures.

| Structure       | $IE_a$ (eV) | $AE_a$ (eV) |
|-----------------|-------------|-------------|
| <b>C5-iso1</b>  | 7.51        |             |
| <b>A5-iso1</b>  |             | 3.10        |
| <b>C6-iso1</b>  | 7.03        |             |
| <b>C6-iso2</b>  | 7.07        |             |
| <b>C7-iso1</b>  | 6.30        |             |
| <b>C7-iso2</b>  | 6.50        |             |
| <b>C7-iso3</b>  | 6.15        |             |
| <b>N7-iso2</b>  | 7.09        | 2.90        |
| <b>N7-iso3</b>  | 6.50        | 2.60        |
| <b>C8-iso2</b>  | 6.65        |             |
| <b>N8-iso2</b>  | 7.34        | 3.11        |
| <b>N8-iso3</b>  | 7.63        | 3.25        |
| <b>A8-iso2</b>  |             | 3.57        |
| <b>C9-iso1</b>  | 6.67        |             |
| <b>N9-iso1</b>  | 7.87        | 3.31        |
| <b>A9-iso2</b>  |             | 3.52        |
| <b>N10-iso2</b> | 6.96        | 2.95        |
| <b>N10-iso3</b> | 6.63        | 2.98        |
| <b>A10-iso1</b> |             | 3.57        |

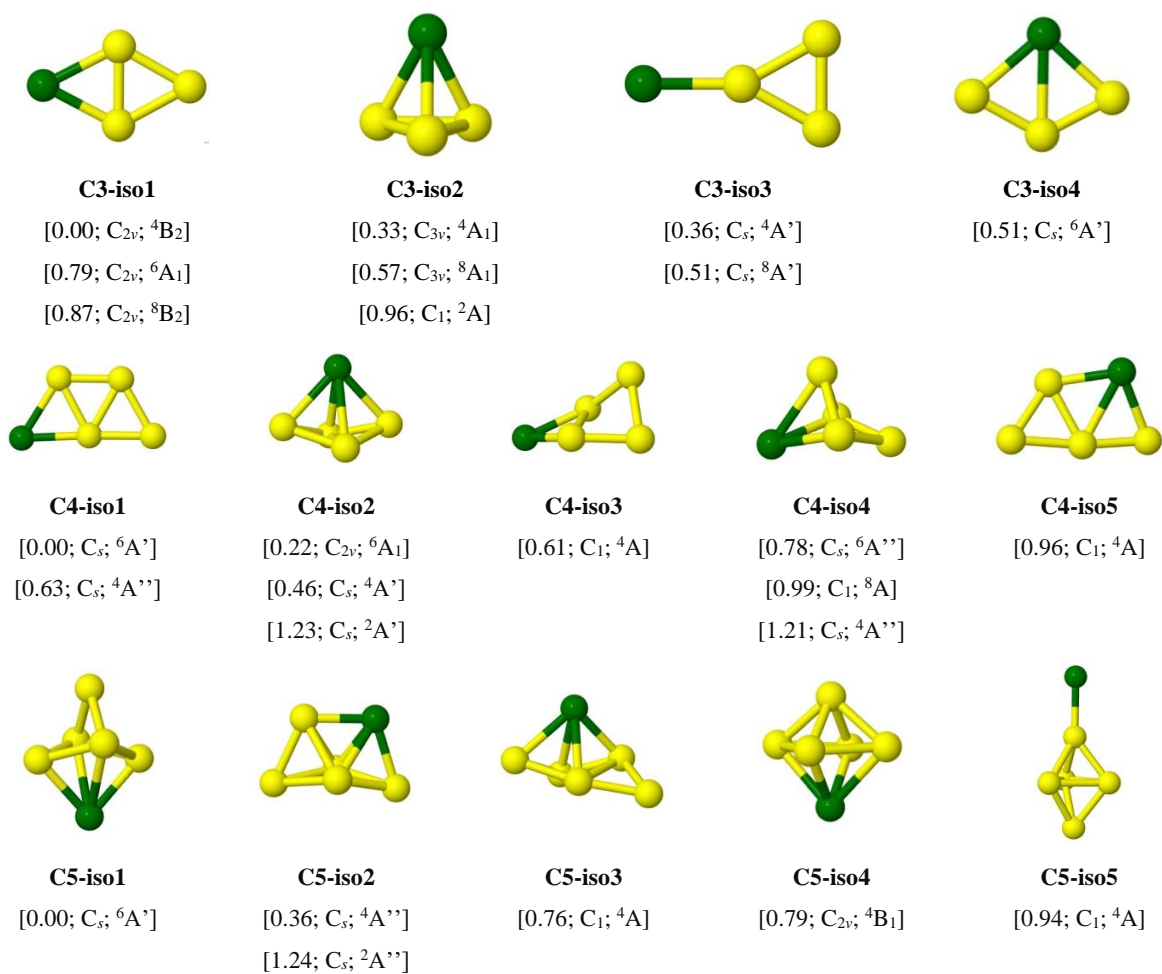

**Figure S2.** Stable isomers of the cationic CrSi<sub>n</sub><sup>+</sup> cluster (n = 3-5)

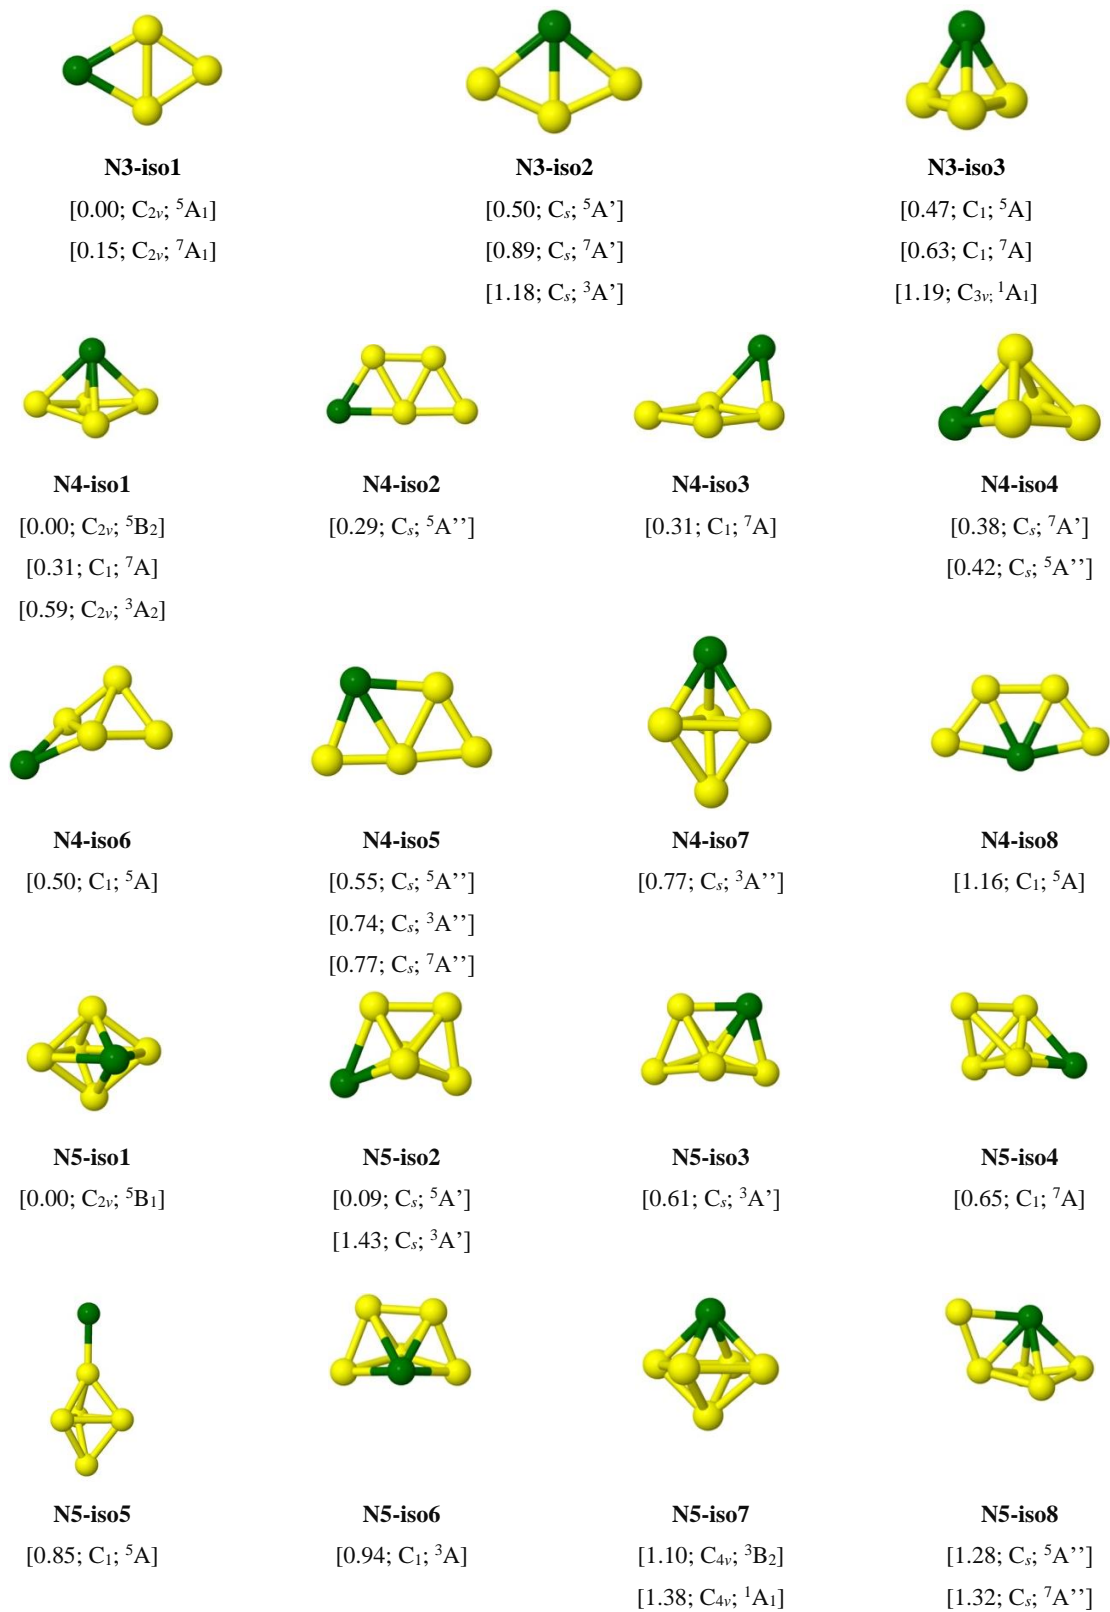

**Figure S3.** . Stable isomers of the neutral CrSi<sub>n</sub> cluster (n = 3-5)



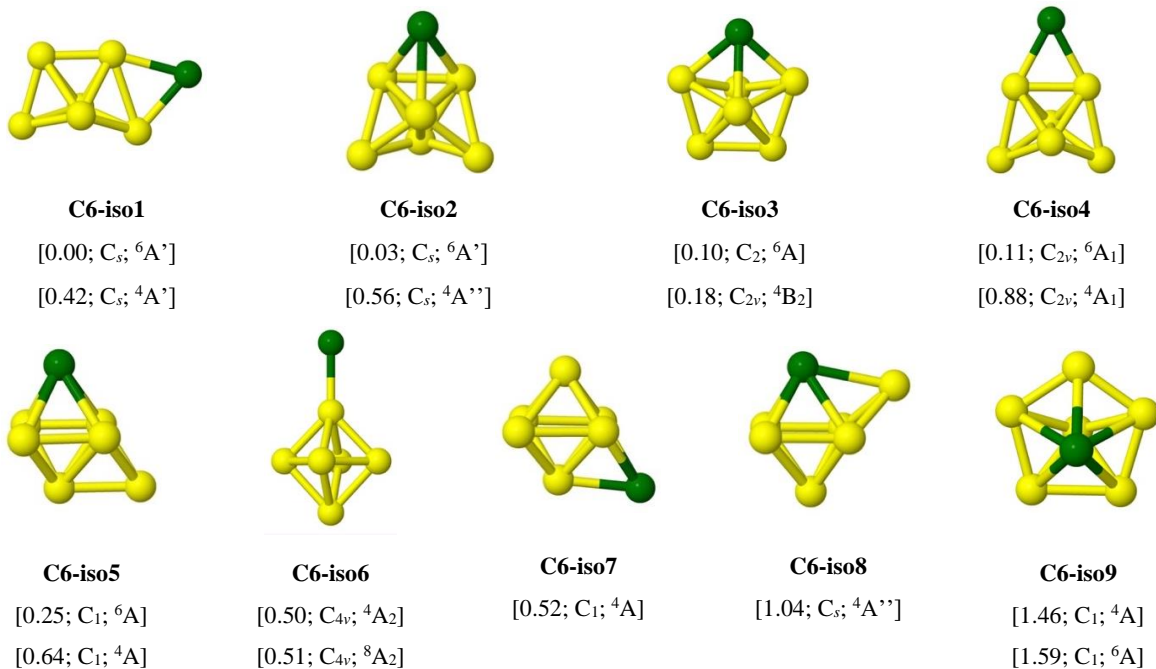

**Figure S4.** Stable isomers of the cationic CrSi<sub>6</sub><sup>+</sup> cluster.

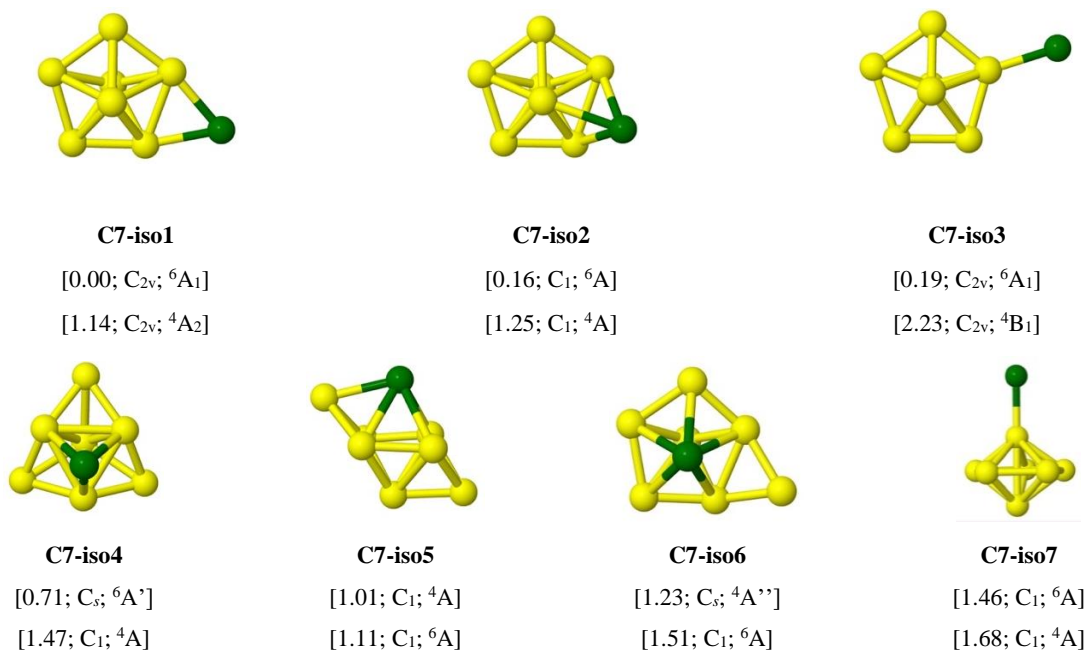

**Figure S5.** Stable isomers of cationic CrSi<sub>7</sub><sup>+</sup> cluster.

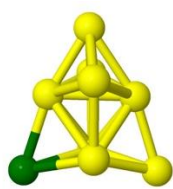

**C8-iso1**  
[0.00; C<sub>s</sub>; <sup>4</sup>A'']  
[0.43; C<sub>1</sub>; <sup>6</sup>A/  
86i cm<sup>-1</sup>]

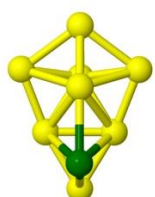

**C8-iso2**  
[0.06; C<sub>s</sub>; <sup>6</sup>A']  
[0.34; C<sub>s</sub>; <sup>4</sup>A']

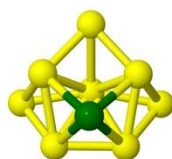

**C8-iso3**  
[0.18; C<sub>s</sub>; <sup>4</sup>A']  
[0.53; C<sub>s</sub>; <sup>6</sup>A']

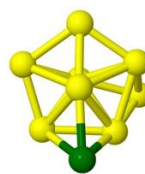

**C8-iso4-L**  
[0.19; C<sub>1</sub>; <sup>4</sup>A]  
[0.39; C<sub>1</sub>; <sup>6</sup>A]

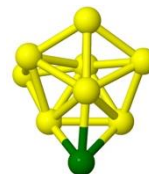

**C8-iso4-R**  
[0.19; C<sub>1</sub>; <sup>4</sup>A]  
[0.39; C<sub>1</sub>; <sup>6</sup>A]

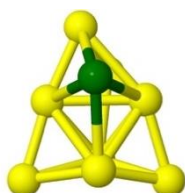

**C8-iso5-L**  
[0.23; C<sub>1</sub>; <sup>6</sup>A]  
[0.31; C<sub>s</sub>; <sup>4</sup>A'']

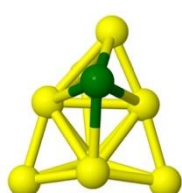

**C8-iso5-R**  
[0.23; C<sub>1</sub>; <sup>6</sup>A]  
[0.31; C<sub>s</sub>; <sup>4</sup>A'']

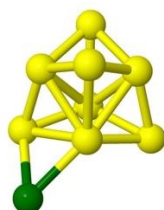

**C8-iso6**  
[0.24; C<sub>1</sub>; <sup>6</sup>A]  
[0.49; C<sub>1</sub>; <sup>4</sup>A]

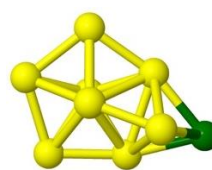

**C8-iso7**  
[0.25; C<sub>s</sub>; <sup>4</sup>A'']  
[0.53; C<sub>1</sub>; <sup>6</sup>A]

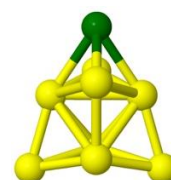

**C8-iso8**  
[0.26; C<sub>s</sub>; <sup>4</sup>A'']  
[0.34; C<sub>1</sub>; <sup>6</sup>A]

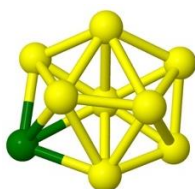

**C8-iso9**  
[0.28; C<sub>1</sub>; <sup>4</sup>A]  
[0.46; C<sub>1</sub>; <sup>6</sup>A]

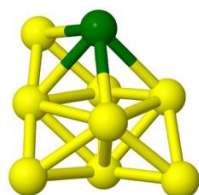

**C8-iso10-L**  
[0.29; C<sub>1</sub>; <sup>4</sup>A]  
[0.29; C<sub>1</sub>; <sup>6</sup>A]

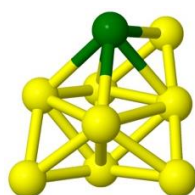

**C8-iso10-R**  
[0.29; C<sub>1</sub>; <sup>4</sup>A]  
[0.29; C<sub>1</sub>; <sup>6</sup>A]

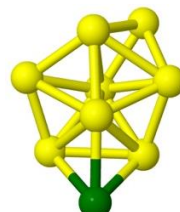

**C8-iso11**  
[0.32; C<sub>1</sub>; <sup>4</sup>A]  
[0.55; C<sub>1</sub>; <sup>6</sup>A]

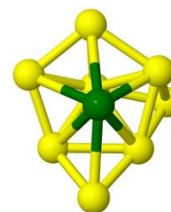

**C8-iso12**  
[0.33; C<sub>1</sub>; <sup>4</sup>A]

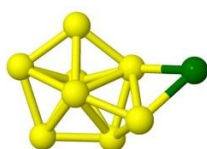

**C8-iso13**  
[0.37; C<sub>1</sub>; <sup>4</sup>A]  
[0.60; C<sub>1</sub>; <sup>6</sup>A]

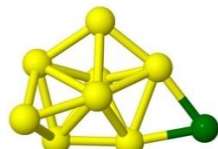

**C8-iso14**  
[0.52; C<sub>1</sub>; <sup>4</sup>A]

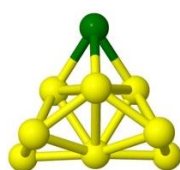

**C8-iso15**  
[0.54; C<sub>s</sub>; <sup>4</sup>A'']  
[0.73; C<sub>s</sub>; <sup>6</sup>A'']

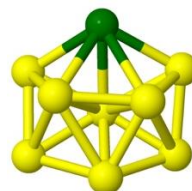

**C8-iso16**  
[0.56; C<sub>1</sub>; <sup>4</sup>A]  
[0.61; C<sub>1</sub>; <sup>6</sup>A]

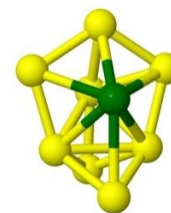

**C8-iso17**  
[0.67; C<sub>s</sub>; <sup>4</sup>A'']  
[0.75; C<sub>s</sub>; <sup>6</sup>A'']

**Figure S6.** Stable isomers of cationic CrSi<sub>8</sub><sup>+</sup> cluster.

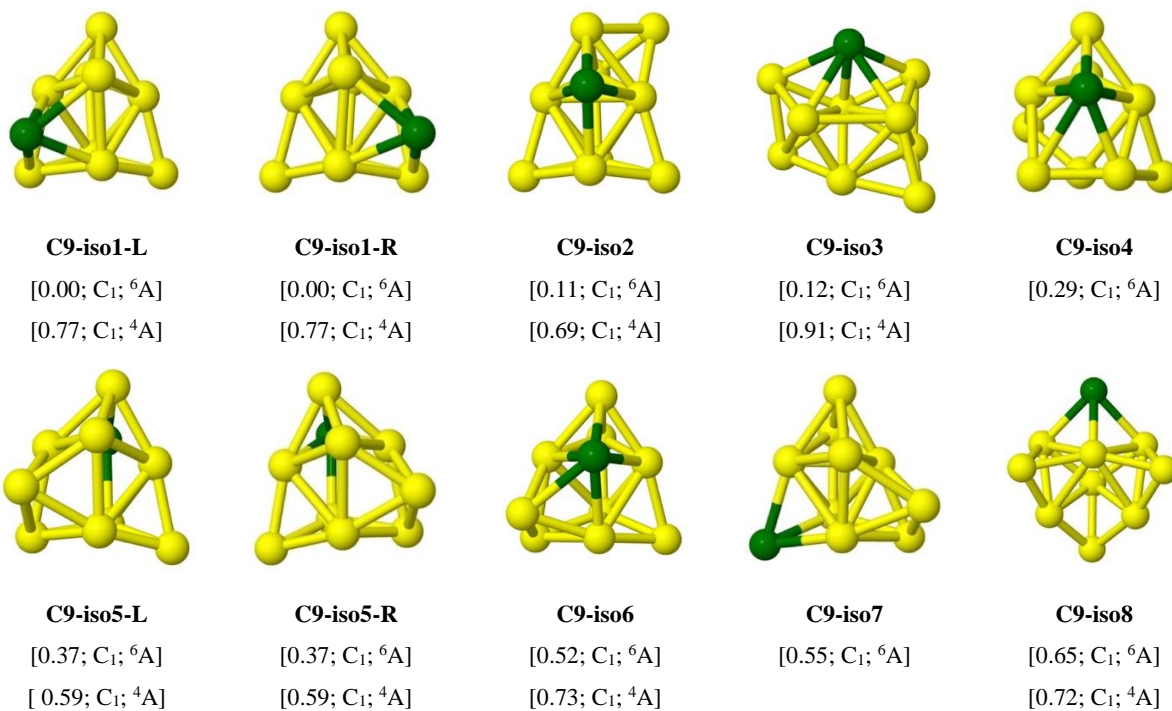

**Figure S7.** Stable isomers of cationic CrSi<sub>9</sub><sup>+</sup> cluster.

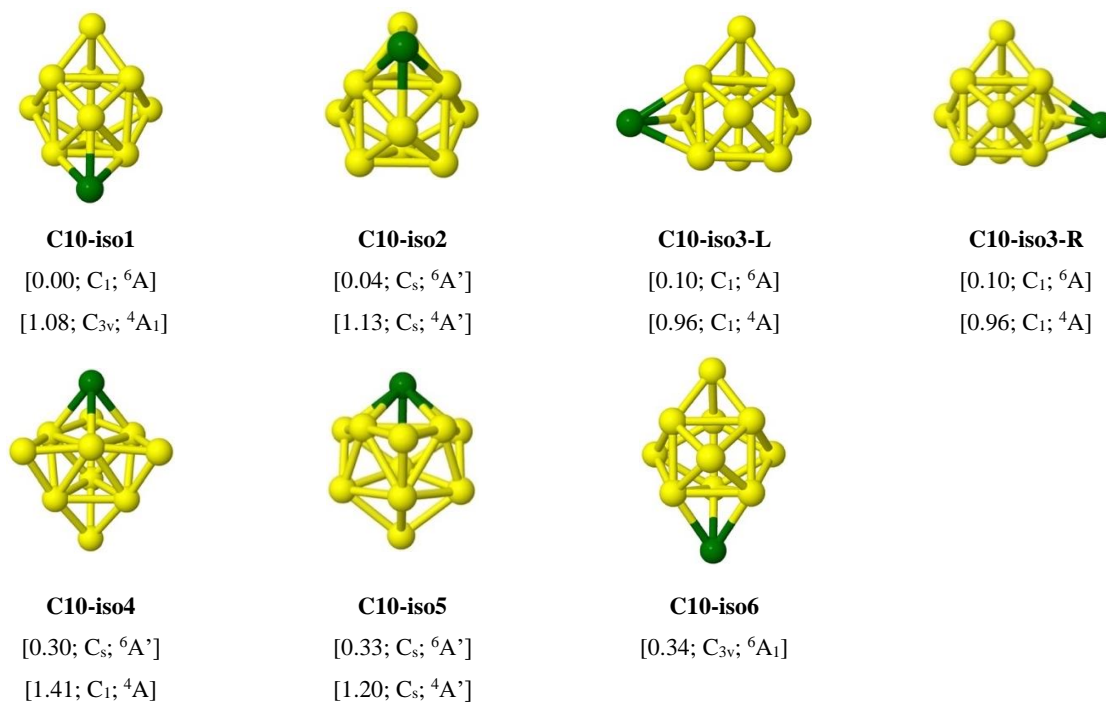

**Figure S8.** Stable isomers of cationic CrSi<sub>10</sub><sup>+</sup> cluster.

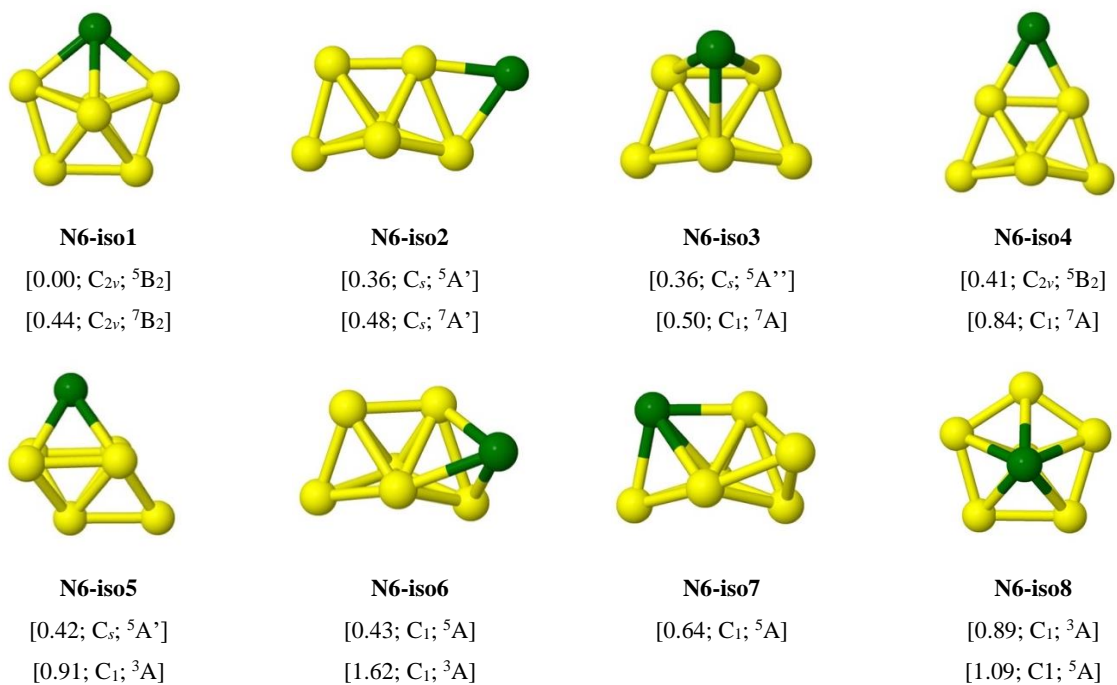

**Figure S9.** Stable isomers of neutral CrSi<sub>6</sub> cluster

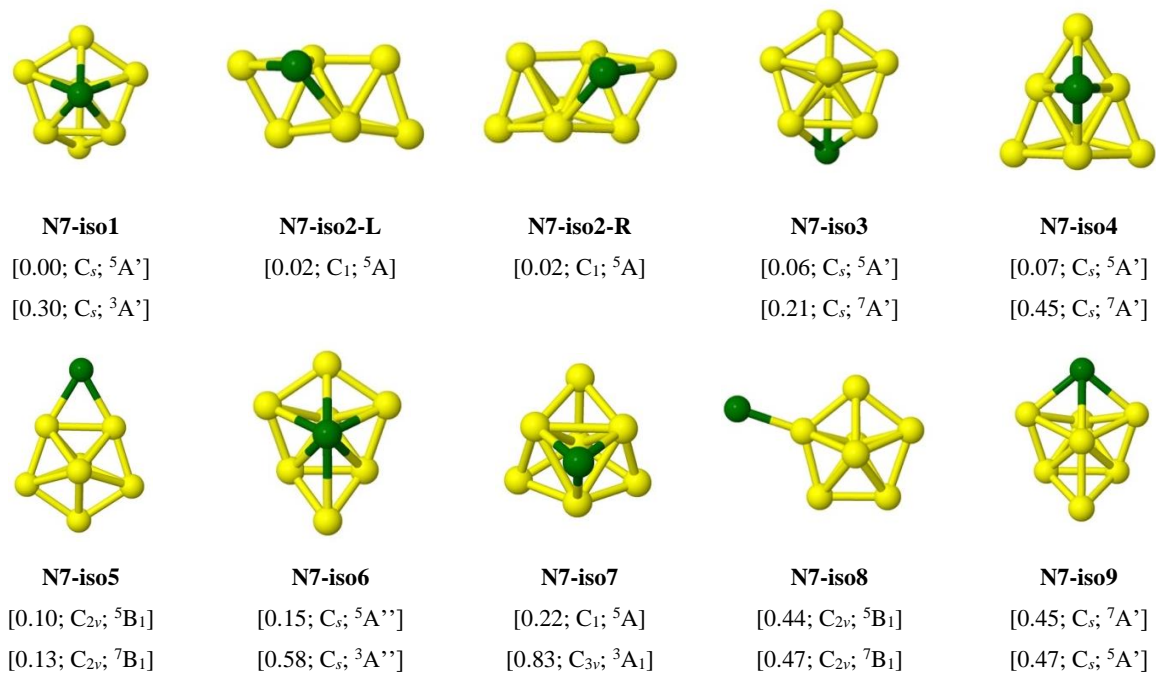

**Figure S10.** Stable isomers of neutral CrSi<sub>7</sub> cluster

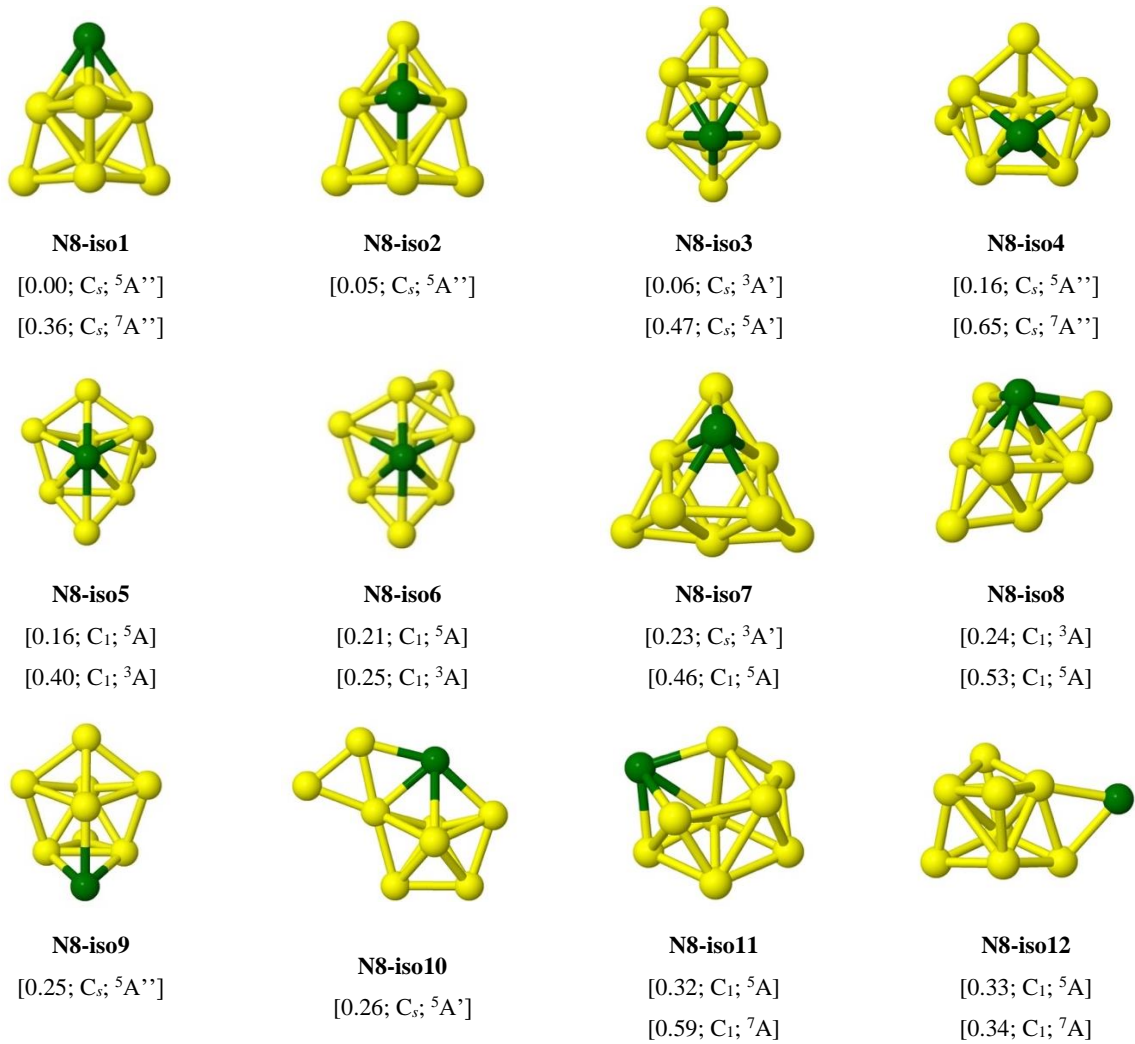

**Figure S11.** Stable isomers of neutral CrSi<sub>8</sub> cluster

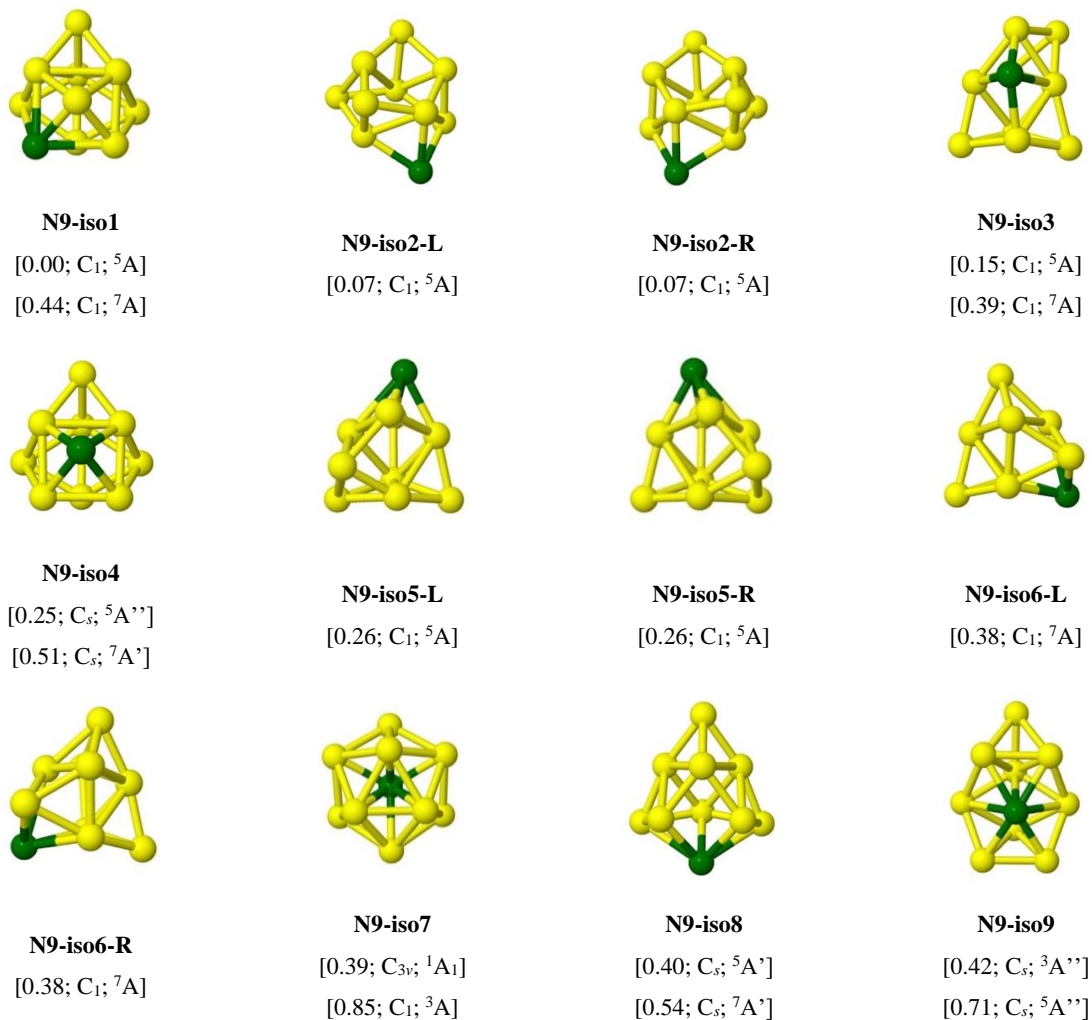

**Figure S12.** Stable isomers of neutral CrSi<sub>9</sub> cluster

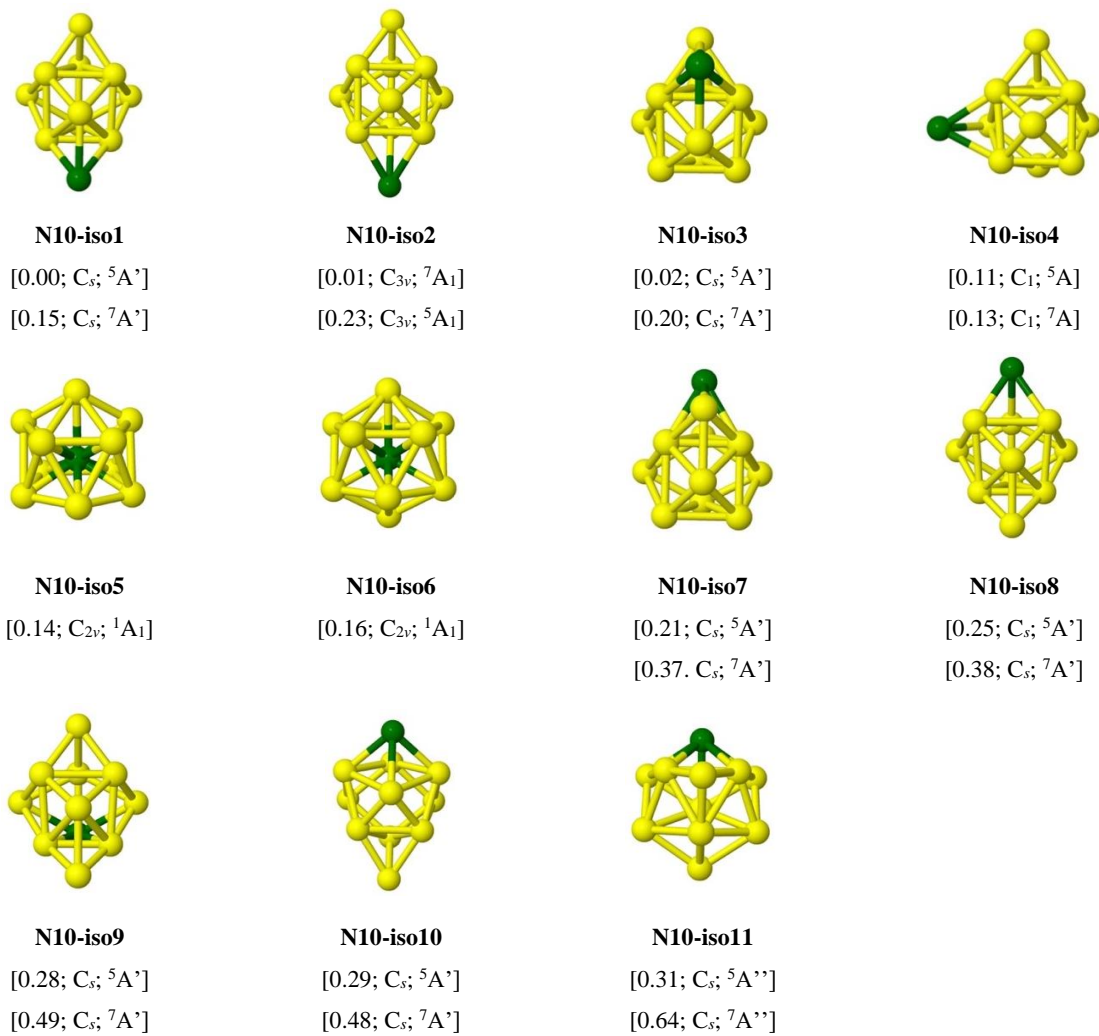

**Figure S13.** Stable isomers of neutral CrSi<sub>10</sub> cluster

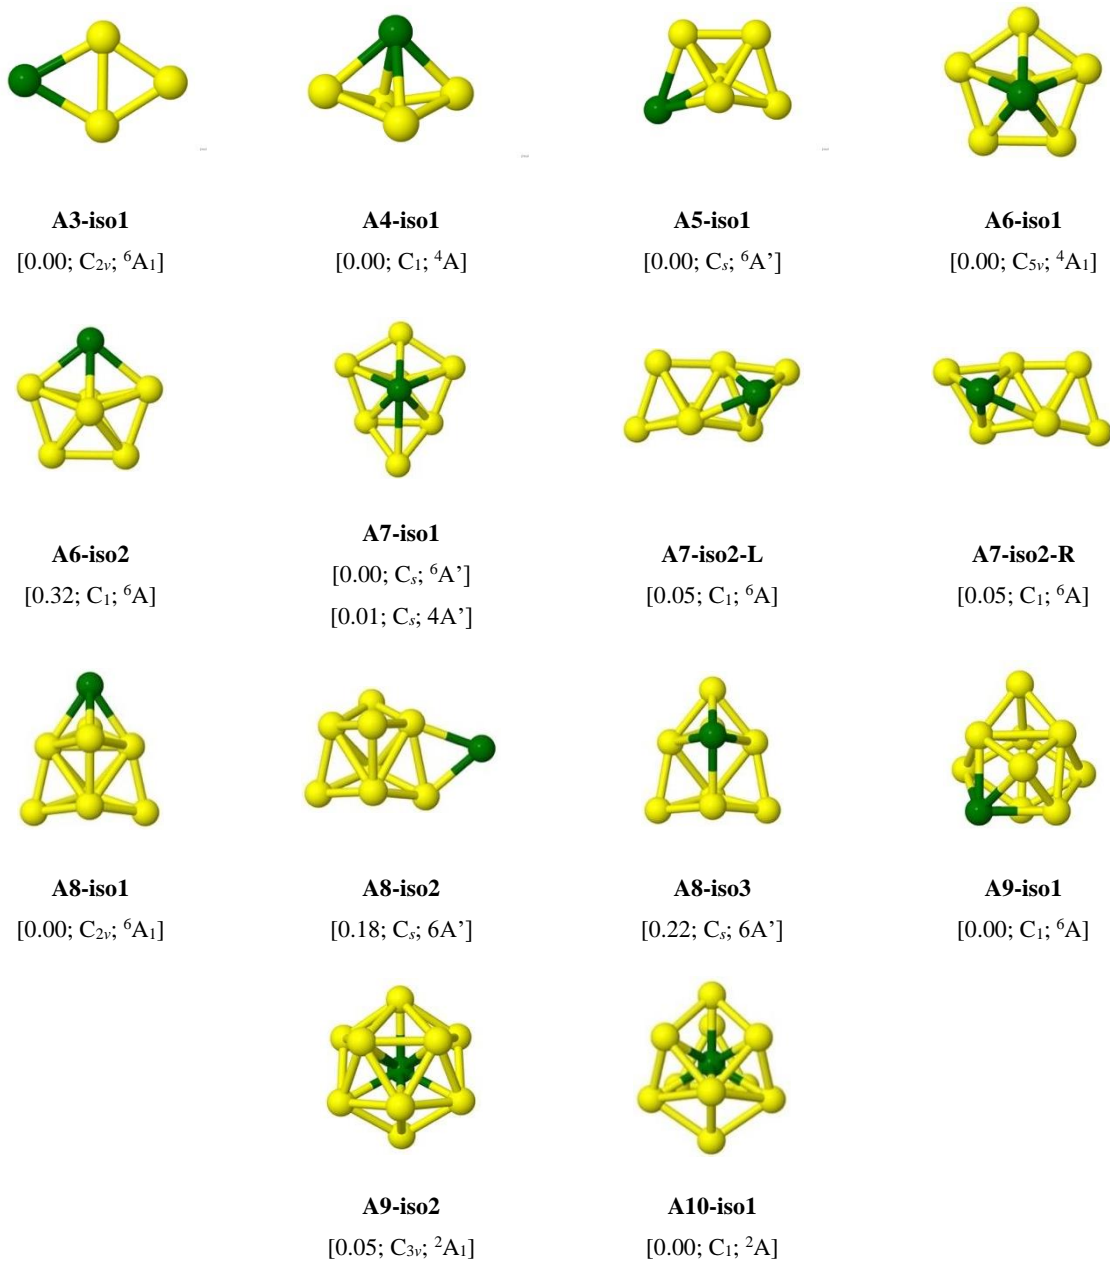

**Figure S14.** Stable structures of anionic CrSi<sub>n</sub><sup>-</sup> cluster (n = 6-10).



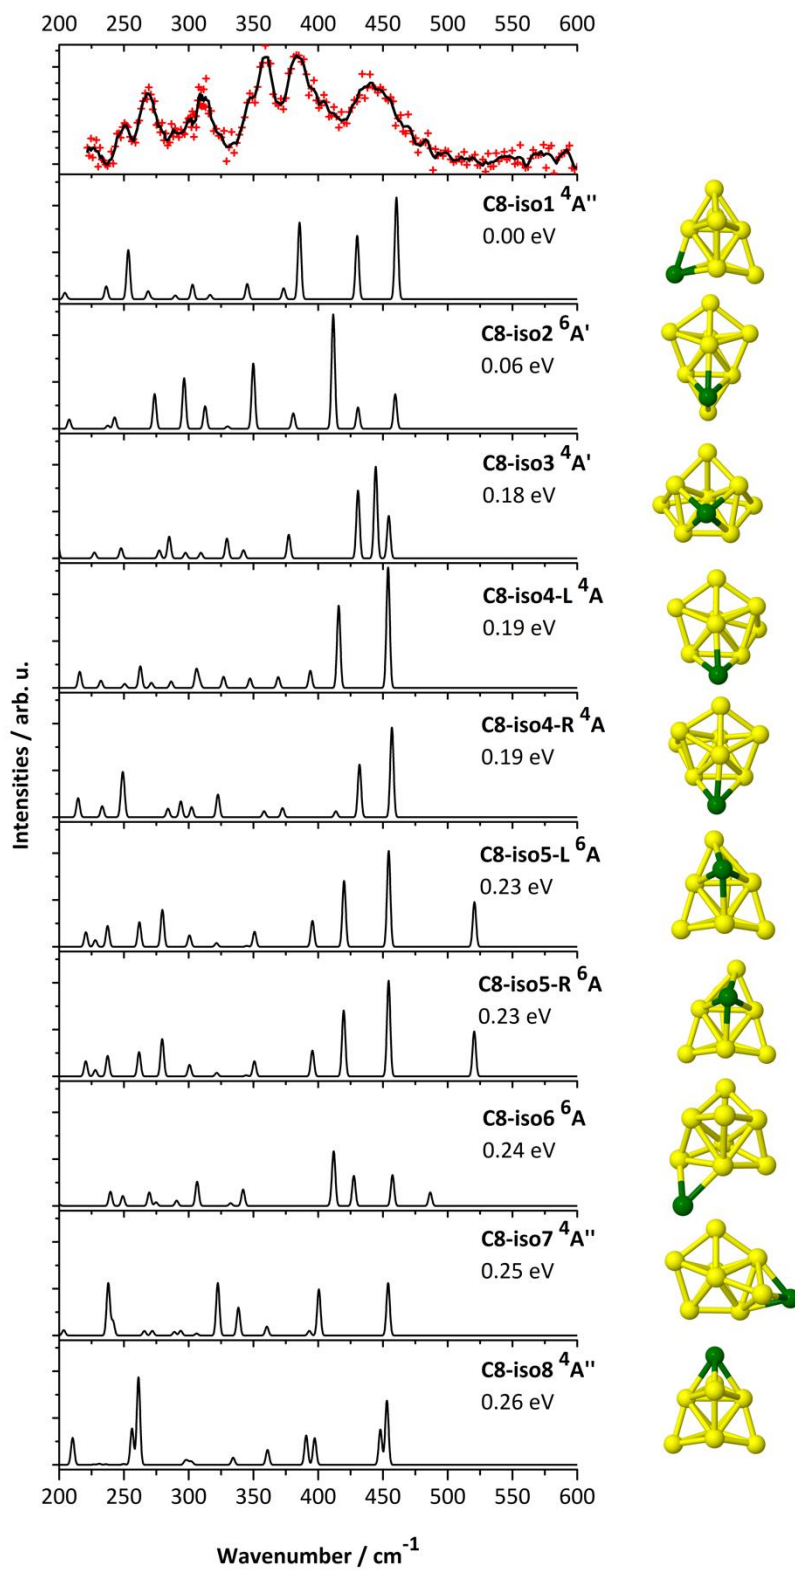

**Figure S15.** IR spectra comparison of  $\text{CrSi}_8^+$  clusters between calculation and experiment.

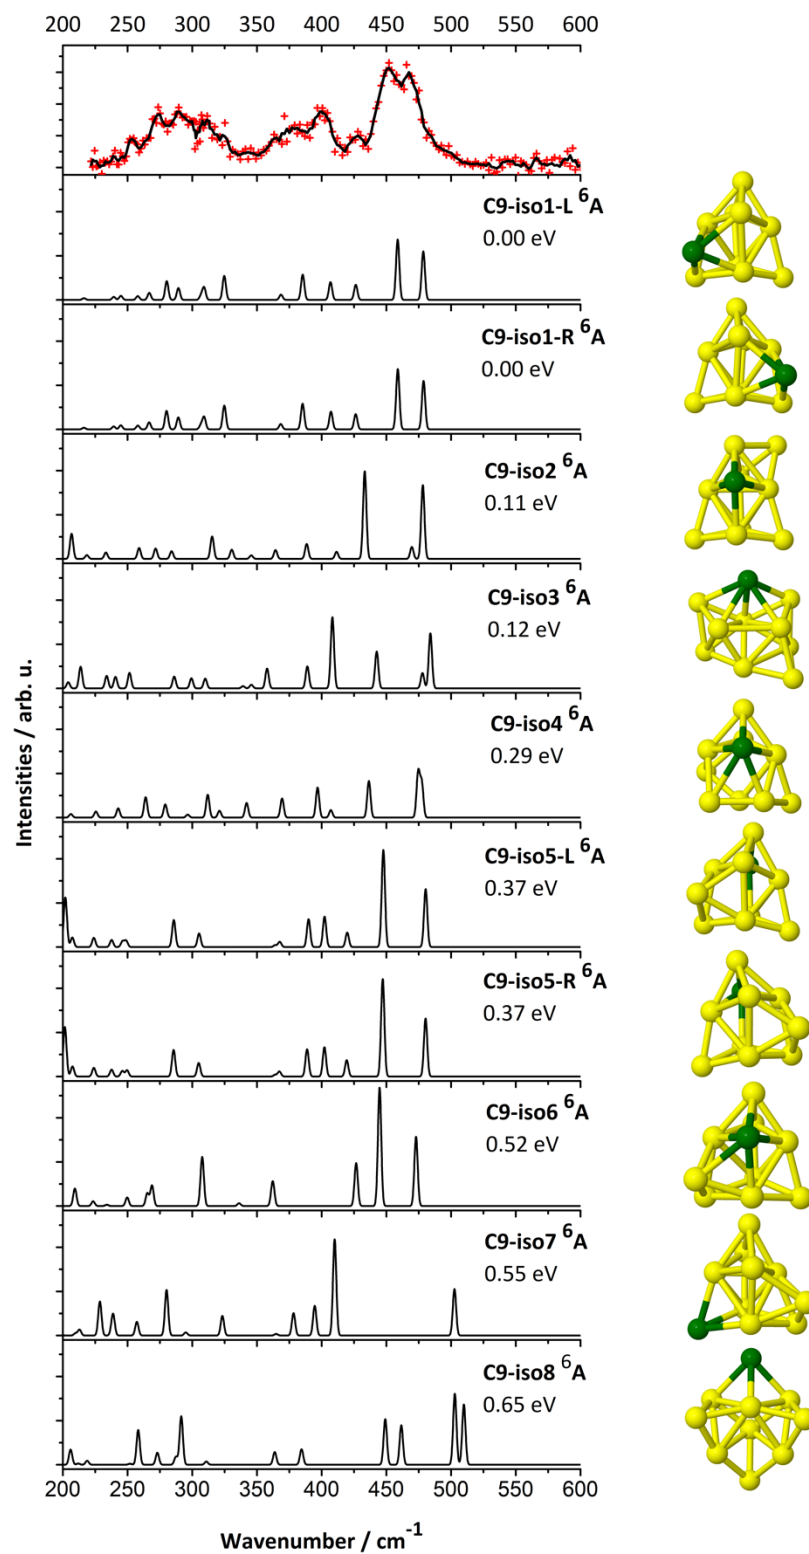

**Figure S16.** IR spectra comparison of  $\text{CrSi}_9^+$  clusters between calculation and experiment.

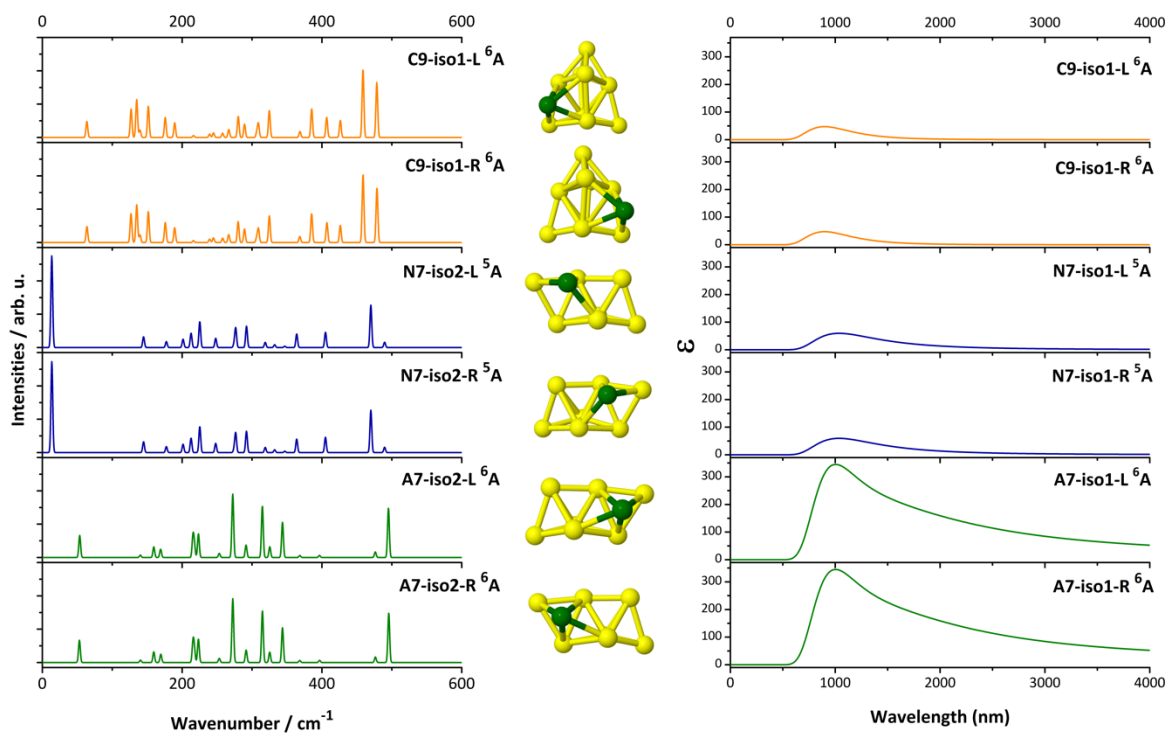

**Figure S17.** Calculated-IR and UV-Vis spectra of ground-state enantiomeric clusters  $\text{CrSi}_n^{+/0/-}$  ( $n = 9$  for cation,  $n = 7$  for neutral and anion).

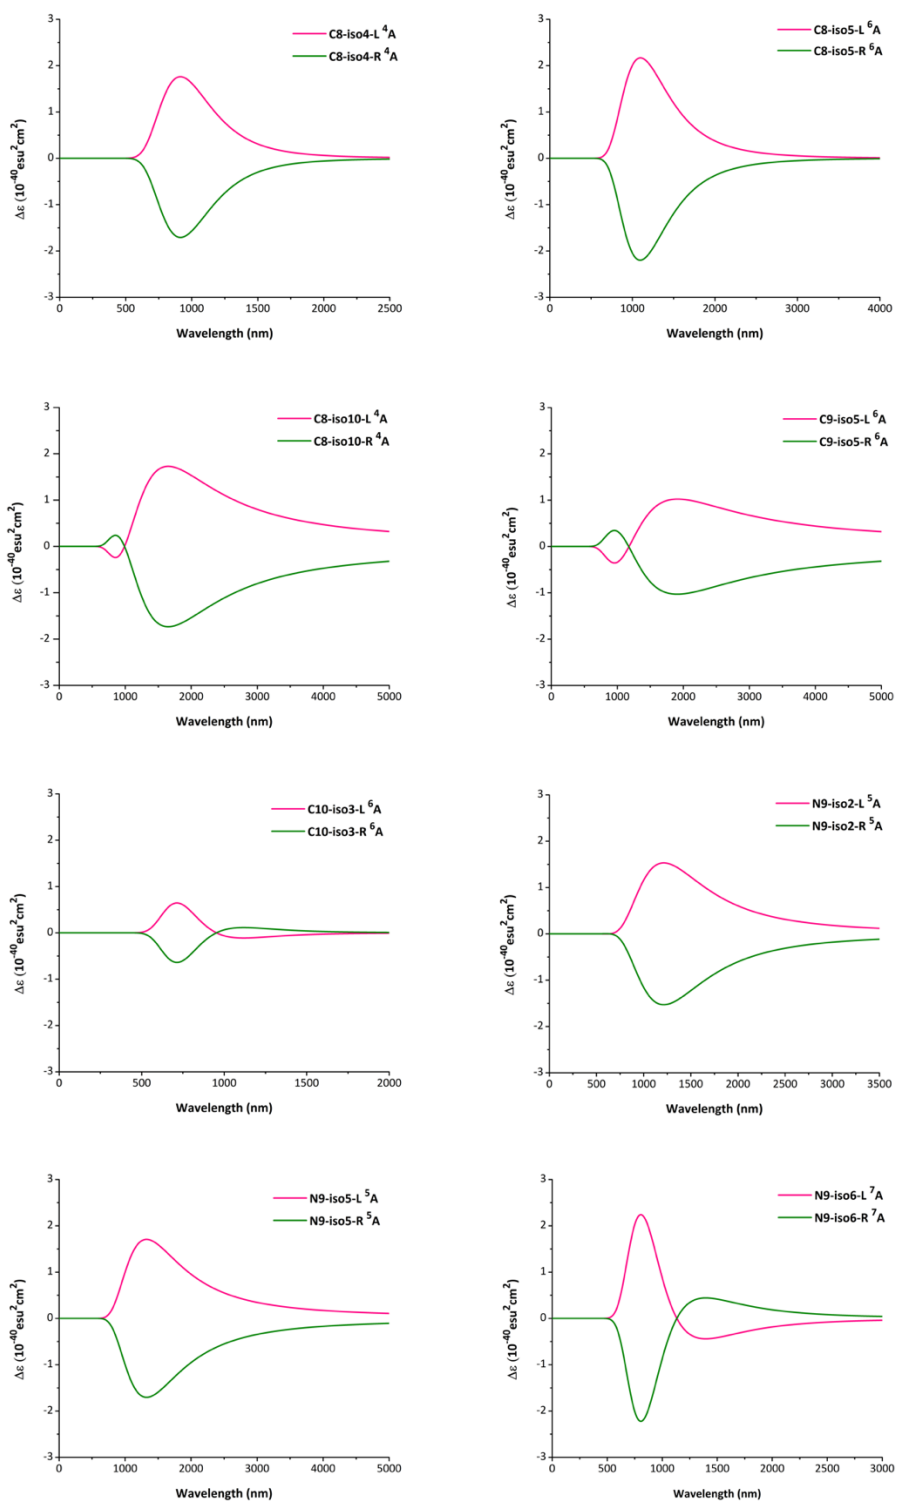

**Figure S18.** Calculated Electronic Circular Dichroism spectra of higher-energy enantiomeric clusters  $\text{CrSi}_n^{+/0/-}$  ( $n = 3-10$ ).
